# Supplementary material for: Endothelial Dicer promotes atherosclerosis and vascular inflammation by miRNA-103-mediated suppression of KLF4
Source: PubMed Central journal article supplement (PMC4742841; doi:10.1038/ncomms10521), 2016-02-03
Supplement: ncomms10521-s1.pdf [file ncomms10521-s1.pdf]

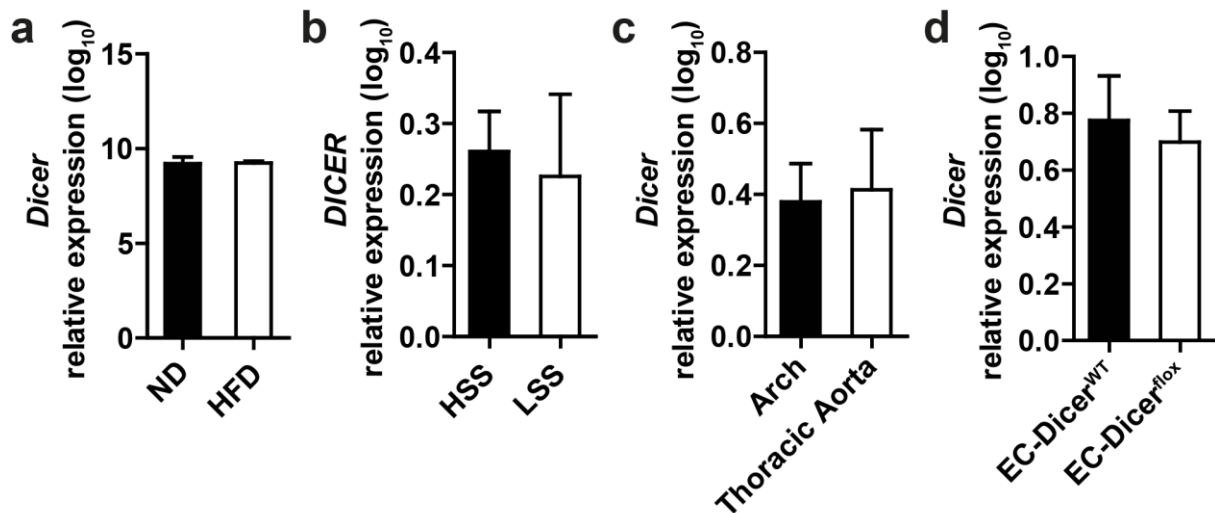

**Supplementary Figure 1. Regulation of *Dicer* expression.** (a) Quantitative RT-PCR analyses of *Dicer* mRNA expression in aortas of *Apoe*<sup>-/-</sup> mice fed a normal diet (ND) or a high fat diet (HFD) for 12 weeks (n = 3–4 mice per group). (b) Quantitative RT-PCR analyses of *Dicer* mRNA expression in human aortic ECs (HAECs) exposed to high shear stress (HSS) compared to low shear stress (LSS) for 48 h (n = 3–4 per group). (c) The expression levels of *Dicer* in the aortic arch and thoracic aorta of *Apoe*<sup>-/-</sup> mice fed a HFD (n = 4 mice per group). (d) *Dicer* mRNA expression in CD11b<sup>+</sup> peripheral blood cells isolated from EC-*Dicer*<sup>WT</sup> and EC-*Dicer*<sup>flox</sup> mice fed a HFD for 4 weeks (n = 6 mice per group). The data are represented as the mean  $\pm$  s.e.m. of the indicated number (n) of repeats. Student *t*-test was used to compare the groups.

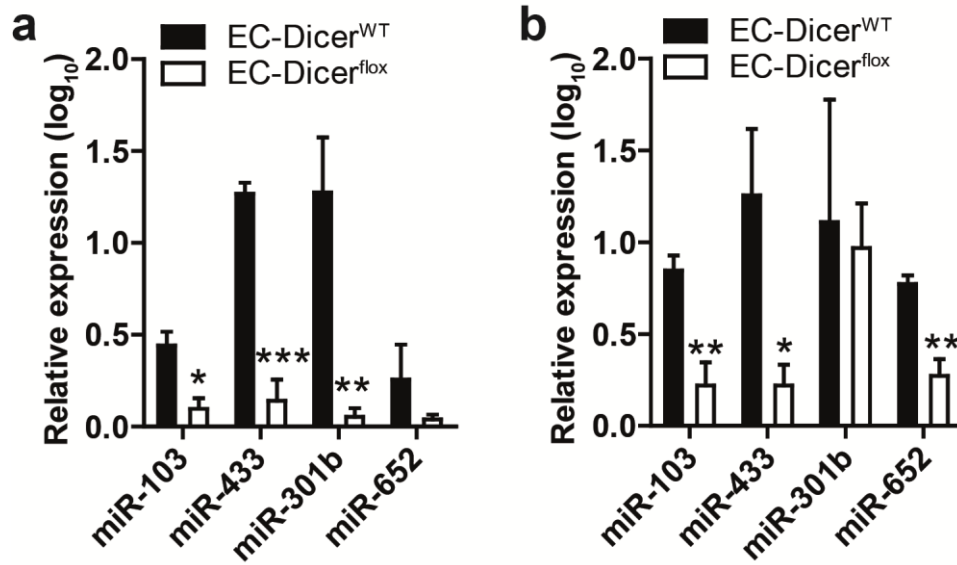

**Supplementary Figure 2. Effects of endothelial Dicer deficiency on miRNA expression in different parts of the aorta.** (a, b) The expression levels of miR-103, miR-301b, miR-433, and miR-652 in the aortic arch (a) and descending thoracic aorta (b) from EC-Dicer<sup>WT</sup> compared to EC-Dicer<sup>flox</sup> mice after HFD feeding (n = 3–4 mice per group). The data are represented as the mean ± s.e.m. of the indicated number (n) of repeats. \**P* < 0.05, \*\**P* < 0.01, and \*\*\**P* < 0.001. Student *t*-test was used to compare the groups.

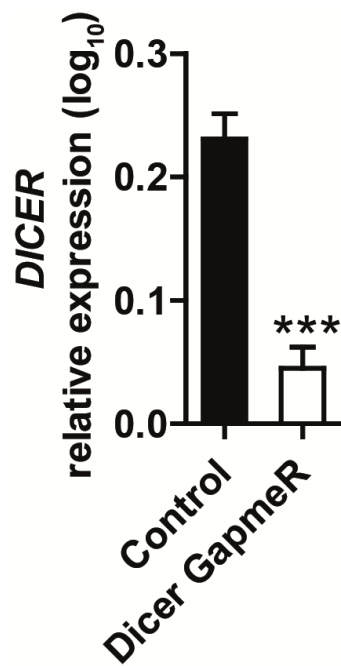

**Supplementary Figure 3. Silencing of Dicer in ECs.** Quantitative RT-PCR analyses of *DICER* mRNA expression in human aortic ECs (HAECs) treated with Dicer-specific LNA-GapmeRs or non-targeting control LNA-GapmeRs (n = 5 per group). The data are represented as the mean  $\pm$  s.e.m. of the indicated number (n) of repeats. \*\*\* $P < 0.001$ . Student *t*-test was used to compare the groups.

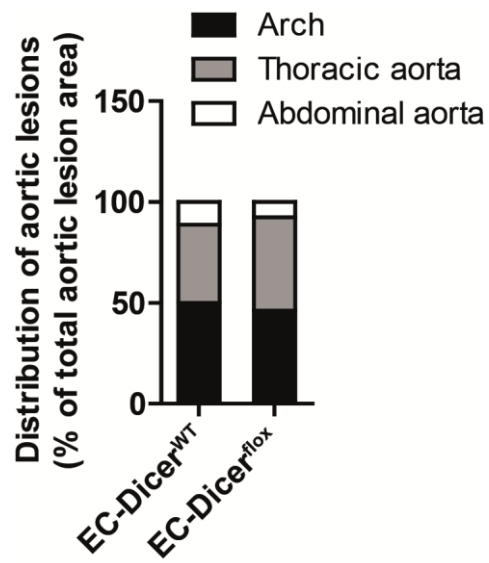

**Supplementary Figure 4. Effects of endothelial Dicer deletion on the distribution of aortic lesions.** Distribution of atherosclerotic lesions between the arch, thoracic aorta and abdominal aorta of EC-Dicer<sup>WT</sup> and EC-Dicer<sup>flox</sup> mice fed a HFD for 12 weeks (n = 5 mice per group). P = not significant. Student *t*-test was used to compare the groups.

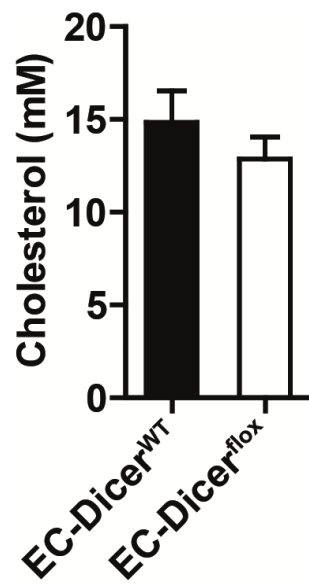

**Supplementary Figure 5. Effect of endothelial Dicer knockout on serum cholesterol levels.** Cholesterol levels were analyzed in the serum of EC-Dicer<sup>WT</sup> and EC-Dicer<sup>flox</sup> mice after 12 weeks of HFD feeding (n = 4–5 mice per group). The data are represented as the mean  $\pm$  s.e.m. of the indicated number (n) of repeats. Student *t*-test was used to compare the groups.

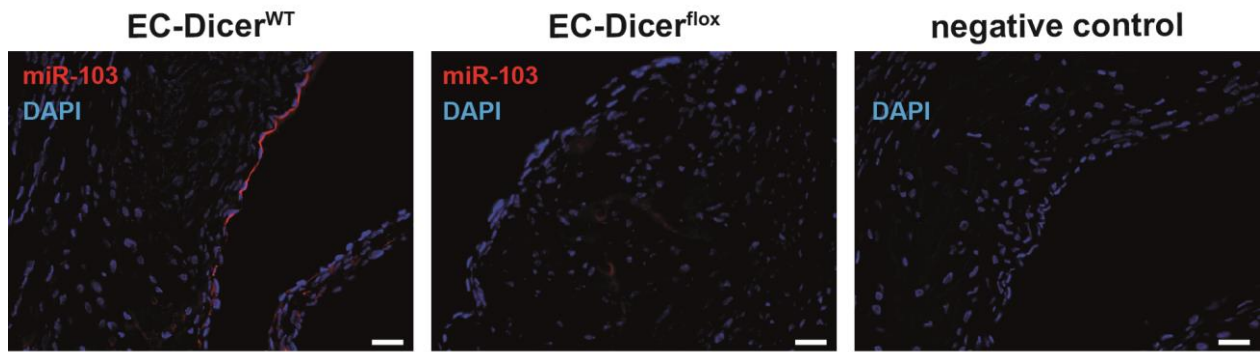

**Supplementary Figure 6. MiR-103 expression in aortic root lesions.** MiR-103 expression in aortic root lesions after 12 weeks of HFD feeding, as determined by *in situ* PCR. The nuclei were counterstained with DAPI. Negative control staining was performed without reverse transcription. Scale bar, 25  $\mu$ m.

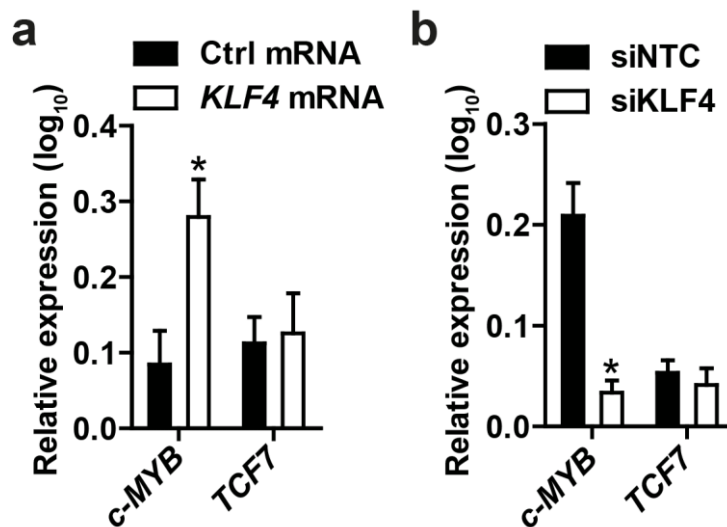

**Supplementary Figure 7. Effects of KLF4 on the expression of *c-MYB* and *TCF7* in ECs.**

(a) Expression of *c-MYB* and *TCF7* mRNAs in HAECs treated with *GFP* control mRNA (Ctrl mRNA) or premade KLF4 mRNAs (n = 3–4 per group). (b) Expression of *c-MYB* and *TCF7* mRNAs in HAECs treated with siRNA against KLF4 (n = 4–5 per group). Non-targeting oligonucleotides were used as control. The data are represented as the mean  $\pm$  s.e.m. of the indicated number (n) of repeats. \**P* < 0.05. Student *t*-test was used to compare the groups.

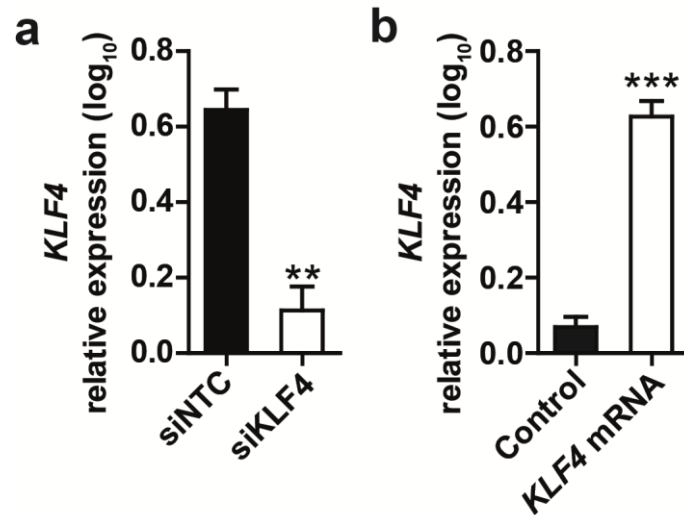

**Supplementary Figure 8. Silencing and overexpression of KLF4 in ECs.** (a) Quantitative RT-PCR analyses of *KLF4* mRNA expression levels in HAECs after silencing KLF4 (siKLF4). A non-targeting siRNA (siNTC) was used in the control group (n = 3–4 per group). (b) The effect of transfection with *GFP* mRNA (control) or premade *KLF4* mRNA on *KLF4* mRNA expression levels in HAECs (n = 3–5 per group). The data are represented as the mean  $\pm$  s.e.m. of the indicated number (n) of repeats. \*\* $P < 0.01$ , and \*\*\* $P < 0.001$ . Student *t*-test was used to compare the groups.

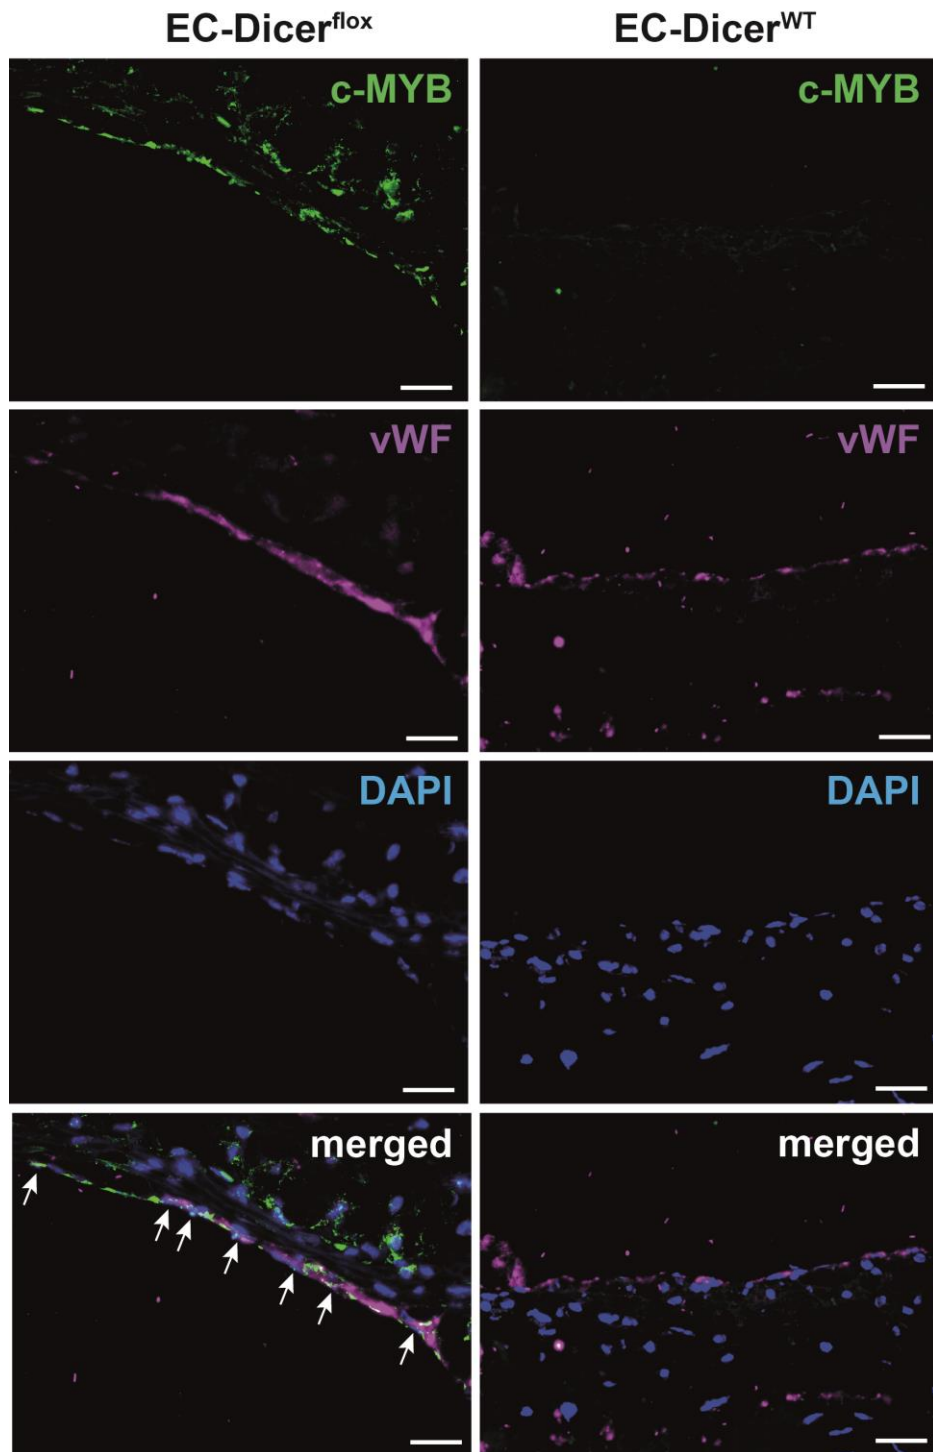

**Supplementary Figure 9. c-Myb expression in ECs.** Immunostaining of c-MYB and von Willebrand factor (vWF) in aortic root sections after 12 weeks of HFD feeding. Arrows indicate c-MYB expressing ECs. The nuclei were stained with DAPI. Scale bar, 25  $\mu$ m.



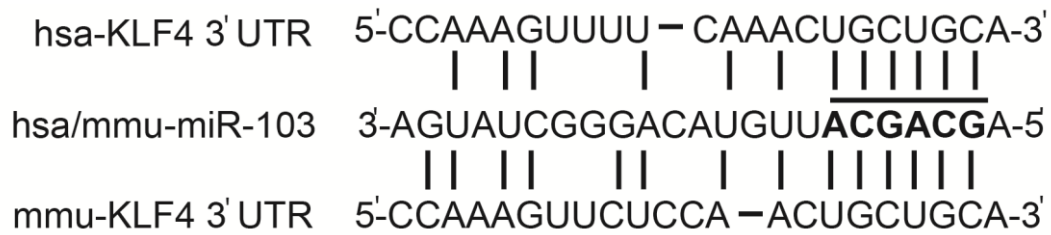

**Supplementary Figure 10.** Target site for human and murine (hsa/mmu) miR-103 in the 3' untranslated region (UTR) of *KLF4* mRNA<sup>1</sup>. The seed sequence of miR-103 is highlighted in bold.

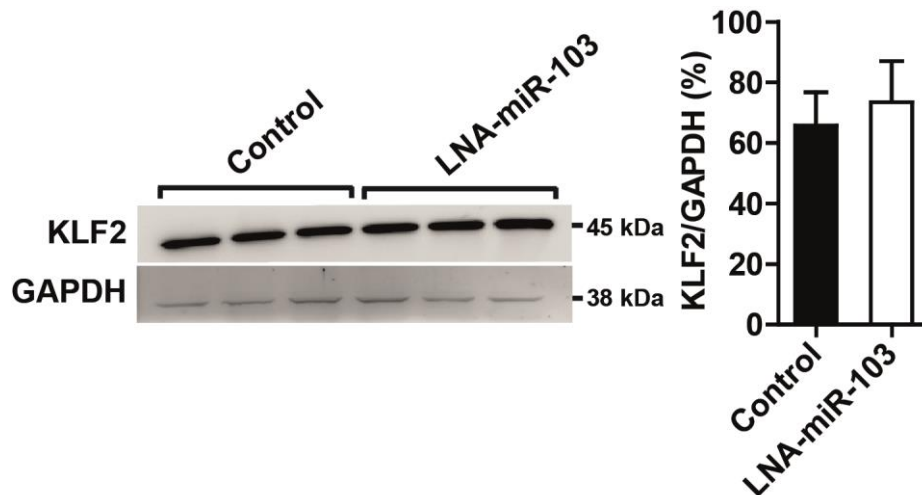

**Supplementary Figure 11. Effects of miR-103 on KLF2 protein expression.** Western blot analyses of KLF2 in HAECs treated with LNA-inhibitors of miR-103 or non-targeting control oligonucleotides. The expression levels were normalized to those of GAPDH (n = 3 per group). Full scans of Western Blots are provided in Supplementary Figure 15. The data are represented as the mean  $\pm$  s.e.m. of the indicated number (n) of repeats. Student *t*-test was used to compare the groups.

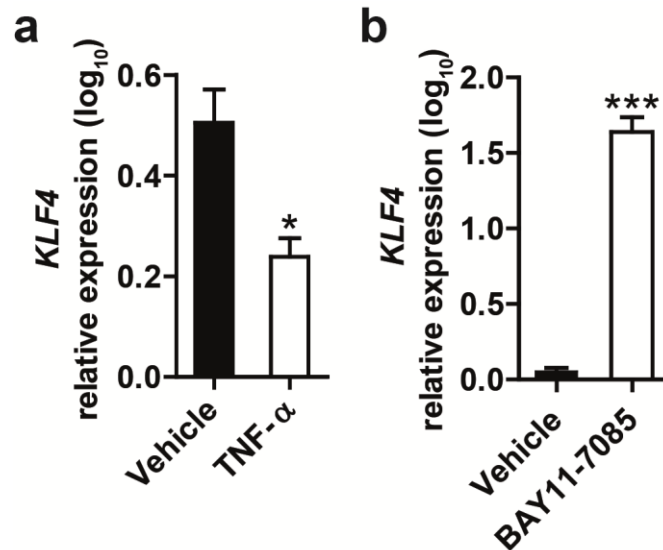

**Supplementary Figure 12. NF-κB reduces *KLF4* expression in ECs.** (a) Quantitative RT-PCR analyses of *KLF4* mRNA expression in HAECs with TNF-α stimulation (n = 4 per group). (b) *KLF4* mRNA expression in HAECs treated with vehicle or the NF-κB-inhibitor BAY11-7085 (n = 5 per group). The data are represented as the mean ± s.e.m. of the indicated number (n) of repeats. \* $P < 0.05$  and \*\*\* $P < 0.001$ . Student *t*-test was used to compare the groups.

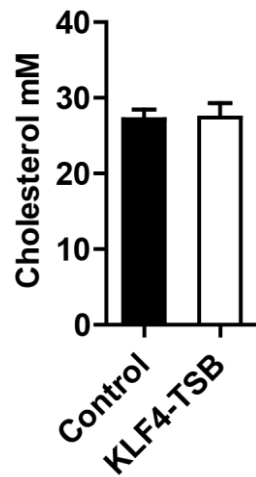

**Supplementary Figure 13. Effect of KLF4-Target Site Blockers (KLF4-TSBs) treatment on serum cholesterol levels.** Cholesterol levels were analyzed in the serum of *Apoe*<sup>-/-</sup> mice treated with KLF4-TSBs or control oligonucleotides after 8 weeks HFD feeding (n = 6–7 mice per group). The data are represented as the mean  $\pm$  s.e.m. of the indicated number (n) of repeats. Student *t*-test was used to compare the groups.

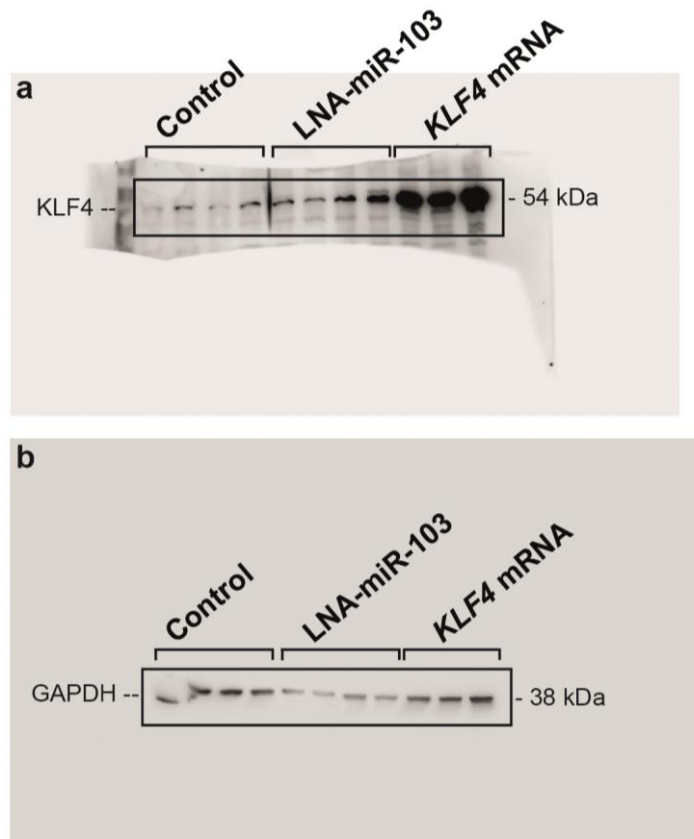

**Supplementary Figure 14. Full scans of the Western Blots for KLF4 and GAPDH.**

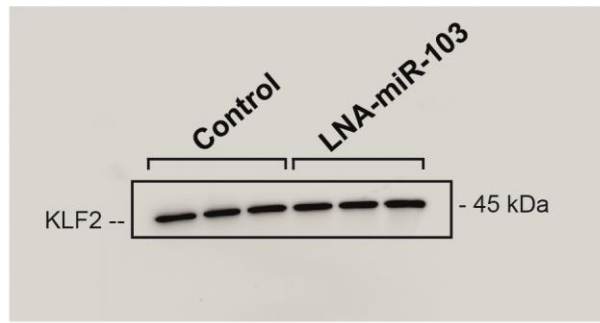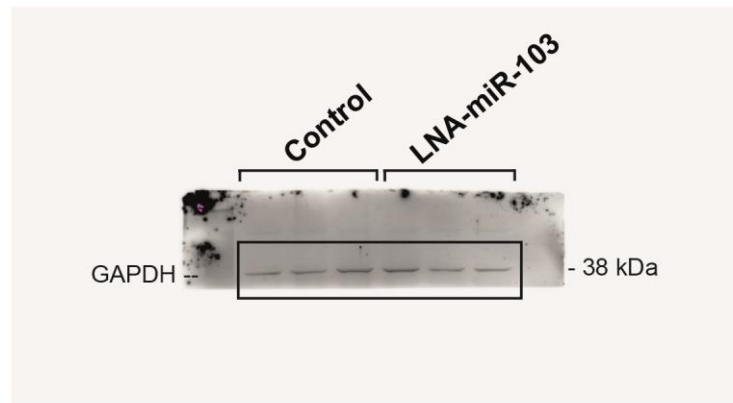

**Supplementary Figure 15. Full scans of the Western Blots for KLF2 and GAPDH.**

## Supplementary Tables

**Supplementary Table 1. Significantly downregulated miRNAs in EC-Dicer<sup>fllox</sup> compared with EC-Dicer<sup>WT</sup> mice after 4 weeks of HFD feeding (n = 3 mice per group).**

| <b>miRNAs</b> | <b>log<sub>10</sub> RQ</b> | <b>neg log<sub>10</sub> P-value</b> |
|---------------|----------------------------|-------------------------------------|
| miR-465C-5p   | -0.52                      | 2.17                                |
| miR-142-5p    | -0.34                      | 1.64                                |
| miR-433       | -0.27                      | 1.34                                |
| miR-495       | -0.20                      | 2.17                                |
| miR-331-3p    | -0.18                      | 2.35                                |
| miR-301b      | -0.18                      | 3.29                                |
| miR-301a      | -0.18                      | 2.59                                |
| miR-615-3p    | -0.18                      | 1.35                                |
| miR-487b      | -0.17                      | 1.77                                |
| miR-425       | -0.13                      | 1.53                                |
| miR-652       | -0.11                      | 1.65                                |
| miR-18a*      | -0.11                      | 1.38                                |
| miR-103       | -0.10                      | 3.50                                |
| miR-1191      | -0.09                      | 1.51                                |

**Supplementary Table 2. Significantly downregulated miRNAs in EC-Dicer<sup>fllox</sup> compared with EC-Dicer<sup>WT</sup> mice after 12 weeks of HFD feeding (n = 3 mice per group).**

| <b>miRNAs</b> | <b>log<sub>10</sub> RQ</b> | <b>neg log<sub>10</sub> P-value</b> |
|---------------|----------------------------|-------------------------------------|
| miR-183       | -0.57                      | 1.60                                |
| miR-433       | -0.50                      | 2.35                                |
| let-7d*       | -0.35                      | 1.32                                |
| miR-669D      | -0.21                      | 1.51                                |
| miR-1198      | -0.21                      | 1.89                                |
| miR-667       | -0.19                      | 1.68                                |
| miR-103       | -0.17                      | 1.50                                |
| miR-106b*     | -0.16                      | 2.52                                |
| miR-301b      | -0.16                      | 1.50                                |
| miR-99b       | -0.15                      | 3.36                                |
| let-7i        | -0.14                      | 2.16                                |
| miR-324-3p    | -0.13                      | 1.71                                |
| miR-652       | -0.13                      | 1.35                                |
| miR-136       | -0.13                      | 1.96                                |
| miR-384-3p    | -0.11                      | 1.48                                |
| miR-434-3p    | -0.07                      | 1.34                                |
| let-7b        | -0.04                      | 2.34                                |
| miR-872*      | -0.02                      | 1.30                                |

### Supplementary Table 3. PCR primer sequences

| Gene                      | Primer Sequence                                                                |
|---------------------------|--------------------------------------------------------------------------------|
| Human:                    |                                                                                |
| <i>CX<sub>3</sub>CL1</i>  | sense 5'-GCAAACGCGCAATCATCTTG-3'<br>antisense 5'-TTGACCCATTGCTCCTTCGG-3'       |
| <i>CXCL1</i>              | sense 5'-CCCAAACCGAAGTCATAGCCA-3'<br>antisense 5'-GATGCAGGATTGAGGCAAGC-3'      |
| <i>CCL2</i>               | sense 5'-CGCTCAGCCAGATGCAATCAA-3'<br>antisense 5'-GACACTTGCTGCTGGTGATTC-3'     |
| <i>KLF4</i>               | sense 5'-ATCTCAAGGCACACCTGCG-3'<br>antisense 5'-CCTGGTCAGTTCATCTGAGCG-3'       |
| <i>GAPDH</i>              | sense 5'-AGGGCTGCTTTTAACTCTGGT-3'<br>antisense 5'-CCCCACTTGATTTTGGAGGGA-3'     |
| <i>c-MYB</i>              | sense 5'-AAGCTACTGCCTGGACGAAC-3'<br>antisense 5'-TTCCTGTTGACCTTCCGAC-3'        |
| <i>TCF7</i>               | sense 5'-TGCTCCAAGTGGTGGGAATC-3'<br>antisense 5'-GCAGGCAGCCATAGGTACAA-3'       |
| Mouse:                    |                                                                                |
| <i>Dicer1</i>             | sense 5'-GAATAAGGCTTATCTTCTGCAGG-3'<br>antisense 5'-CATAAAGGTGCTTGGTTATGAGG-3' |
| <i>Klf4</i>               | sense 5'-GACTAACCGTTGGCGTGAGG-3'<br>antisense 5'-CGGGTTGTTACTGCTGCAAG-3'       |
| <i>c-Myb</i>              | sense 5'-CGTACCTAAGAACAGGCCCC-3'<br>antisense 5'-GCGTTCACGTATTTCCGAGC-3'       |
| <i>Tcf7</i>               | sense 5'-AGGTGGCATGCACTATCTCG-3'<br>antisense 5'-TTTCCCTTGACCGCCTCTTC-3'       |
| <i>Lef1</i>               | sense 5'-GATCCTGGGCAGAACATGGC-3'<br>antisense 5'-GCTGTCTCTCTTTCCGTGCT-3'       |
| <i>Dkk2</i>               | sense 5'-TCTAGGAAGGCCACACTCCA-3'<br>antisense 5'-TGGGTCTCCTTCATGTCCTTT-3'      |
| <i>Sox17</i>              | sense 5'-TTCCATCTCCACCTCCGACC-3'<br>antisense 5'-GTCGATTGGCACCTTTCACC-3'       |
| <i>B2m</i>                | sense 5'-TCGGTGACCCTGGTCTTTCT-3'<br>antisense 5'-TTTGAGGGGTTTTCTGGATAGCA-3'    |
| Mouse/Human:              |                                                                                |
| Taq-in situ-miR-103 RT    | 5'-GTCGTATCCAGTGCAGGGTCCGAGGTAT<br>TCGCACTGGATACGACTCATA-3'                    |
| Taq-in situ-miR-103       | sense 5'-GCCCAGCAGCATTGTACAG-3'<br>antisense 5'-GTGCAGGGTCCGAGGT-3'            |
| C. elegans:               |                                                                                |
| Taq-in situ-cel-miR-39 RT | 5'-GTCGTATCCAGTGCAGGGTCCGAGGTAT<br>TCGCACTGGATACGACCAAGC-3'                    |
| Taq-in situ-cel-miR-39    | sense 5'-GCCCTCACCGGGTGTAAT-3'<br>antisense 5'-GTGCAGGGTCCGAGGT-3'             |

## Supplementary Reference

- 1 Chen, H. Y. *et al.* miR-103/107 promote metastasis of colorectal cancer by targeting the metastasis suppressors DAPK and KLF4. *Cancer research* **72**, 3631-3641, doi:10.1158/0008-5472.CAN-12-0667 (2012).
